# Supplementary material for: Contributions of primary anthropogenic sources and rapid secondary transformations to organic aerosol pollution in Nanchang, Central China
Source: Copernicus journal article supplement (doi:10.5194/egusphere-2024-3793), 2025-01-06
Supplement: Supplementary file 1 [file egusphere-2024-3793-supplement.pdf]

1 *Supplementary Materials for*

2 **Contributions of primary anthropogenic sources and rapid**  
3 **secondary transformations to organic aerosol pollution in Nanchang,**  
4 **Central China**

5 Wei Guo<sup>a, b</sup>, Zicong Li<sup>a, b</sup>, Renguo Zhu<sup>a, b</sup>, Zhongkui Zhou<sup>a</sup>, Hongwei Xiao<sup>c</sup>, Huayun Xiao<sup>c</sup>

6 a. School of Water Resources and environmental Engineering, East China University of  
7 Technology, Nanchang 330013, China

8 b. Jiangxi Province Key Laboratory of the Causes and Control of Atmospheric Pollution, East  
9 China University of Technology, Nanchang 330013, China

10 c. School of Agriculture and Biology, Shanghai Jiao Tong University, Shanghai 200240, China

11 Correspondence: Huayun Xiao (xiaohuayun@sjtu.edu.cn)

12

13

14 This file contains Text S1 and Text S2, Table S1 and S2, Figure S1 to S6. The detailed information  
15 is as follows:

16 1. Text S1. Meteorological conditions and air quality.....Page 3

17 2. Text S2. Instrumentation and analytical procedures.....Page 3–5

18 3. Table S1. Details of polar organic compounds identified using the GC/MS method, including  
19 limits of detection (LOD) and quantification (LOQ), selected standards and their concentrations in  
20 recovery experiments, along with recovery rates.....Page 6–8

21 4. Table S2. Representative compounds from various emission sources and their mass fractions in  
22 OC and OA. The aerosol mass fractions refer specifically to those present in  
23 PM<sub>2.5</sub>.....Page 9

24 5. Figure S1. Daily variation of PM<sub>2.5</sub> concentrations in Nanchang during the winter of 2023–2024.  
25 Data are sourced from the China Air Quality Online Monitoring and Analysis Platform

26 (<https://www.aqistudy.cn/historydata/>).....Page 12

27 6. Figure S2. Time series of meteorological parameters and gaseous pollutant concentrations

28 during sampling periods.....Page 13

29 7. Figure S3. (a) Correlation between levoglucosan and some primary sugars, sugar alcohols,

30 lignin, resin products, and sterols. (b) Correlation between glycerol and hydroxy

31 acids.....Page 14

32 8. Figure S4. Concentrations and relative abundances of primary organic aerosol (POA) from

33 biomass burning (POA<sub>bb</sub>), coal combustion (POA<sub>cc</sub>), vehicle exhaust (POA<sub>ve</sub>), cooking (POA<sub>c</sub>),

34 plant debris (POA<sub>pd</sub>), and fungal spores (POA<sub>fs</sub>), alongside secondary organic aerosol (SOA)

35 from isoprene (SOA<sub>i</sub>),  $\alpha/\beta$ -pinene (SOA<sub>p</sub>),  $\beta$ -caryophyllene (SOA<sub>c</sub>), toluene (SOA<sub>t</sub>), and

36 naphthalene (SOA<sub>n</sub>).....Page 15

37 9. Figure S5. Comparison of OC and OA concentrations calculated by CMB model with those

38 calculated by tracer-based method.....Page 16

39 10. Figure S6. Time series of POC and SOC concentrations calculated using the tracer-based

40 method, alongside POC and SOC concentrations derived from the EC-based method, as well as

41 PM<sub>2.5</sub> and measured OC concentrations during the sampling periods.....Page 17

42 **Text S1. Meteorological conditions and air quality**

43 During the sampling period, wind speed ranged from 0.8 to 4.4 m s<sup>-1</sup>, with notable peaks in July  
44 and October. Wind patterns exhibited seasonal variability: southwest and easterly winds  
45 dominated in late spring (May) and summer (June – August), while north and north-easterly winds  
46 prevailed in other seasons (Figure S1). The annual rainfall was 3708.9 mm, predominantly  
47 concentrated in spring and summer. Atmospheric pressure fluctuated between 900–1040 hPa,  
48 displaying an inverse relationship with sunshine duration (10–14 hours). Specifically, pressure was  
49 lower in spring and summer, higher in autumn and winter, while sunshine hours showed the  
50 complementary trend. Temperature and relative humidity (RH) varied widely, ranging from –0.5  
51 to 33.9 °C (mean: 19.7 ± 8.7 °C) and 33.9%–95.9% (mean: 72.0 ± 13.9%), respectively. The CO,  
52 O<sub>3</sub>, SO<sub>2</sub> and NO<sub>2</sub> concentrations were 0.42–1.32 mg m<sup>-3</sup> (0.74 ± 0.18 mg m<sup>-3</sup>), 7–187 µg m<sup>-3</sup>  
53 (86.33 ± 36.81 µg m<sup>-3</sup>), 3–28 µg m<sup>-3</sup> (7.92 ± 4.14 µg m<sup>-3</sup>), and 6–84 µg m<sup>-3</sup> (27.68 ± 15.11 µg  
54 m<sup>-3</sup>), respectively. Seasonal variations were particularly notable for SO<sub>2</sub> and NO<sub>2</sub>. These  
55 pollutants exhibited higher concentrations during autumn and winter—coinciding with lower  
56 temperatures and reduced rainfall—and decreased levels in spring and summer when temperatures  
57 and precipitation were elevated. Conversely, O<sub>3</sub> concentrations demonstrated an inverse seasonal  
58 pattern.

59 **Text S2. Instrumentation and analytical procedures**

60 The analytical conditions employed for gas chromatography (GC) were meticulously optimized to  
61 ensure precise qualitative and quantitative assessment of target compounds. Samples were  
62 introduced in splitless mode with the injector maintained at 280 °C. The temperature program of  
63 the GC oven commenced at an initial hold of 50 °C for 2 minutes, followed by a rapid ramp to  
64 120 °C at a rate of 30 °C min<sup>-1</sup>. Subsequently, the temperature was incrementally raised to 300 °C  
65 at a rate of 6 °C min<sup>-1</sup>, where it was sustained for 16 minutes. This carefully calibrated thermal  
66 profile has been extensively detailed in the existing literature (Wang and Kawamura, 2005; Wang  
67 et al., 2006; Fu et al., 2008 and 2010), underscoring its efficacy in the separation of diverse  
68 organic compounds.

69 Qualitative analysis of the target compounds was performed by comparing retention times and

70 ion mass spectra of the compounds in the samples against those of a standard series (see Table S1).  
71 For quantification, the average relative response factor ( $\overline{RRF}$ ) method was employed. The  
72 concentration of target compound x ( $\rho_x$ ) was calculated using the following formula:

$$73 \quad \rho_x = \frac{A_x \times \rho_{IS}}{A_{IS} \times \overline{RRF}},$$

74 where  $A_x$  is response value (peak area) of target compound x,  $A_{IS}$  is the response value of the  
75 internal standard,  $\rho_{IS}$  denotes concentration of the internal standard. The average relative response  
76 factor ( $\overline{RRF}$ ) for the target compound is derived from the individual RRF values of authentic  
77 standards (refer to Table S1) measured at various concentrations. Since some of the target  
78 compounds' standards were difficult to obtain on the market, their RRF could be substituted with  
79 those of other standard compounds with similar properties (Fu et al., 2010 and 2014; Ding et al.,  
80 2012; Yuan et al., 2018). Specifically, the hentriacontanoic acid and dotriacontanoic acid were  
81 quantified using nonacosanoic acid and triacontanoic acid, respectively. The pentacosanol,  
82 nonacosanol, hentriacontanol, dotriacontanol were quantified using tricosanol, heptacosanol,  
83 heptacosanol, and triacontanol, respectively. The glyceric acid was quantified using glycerol. The  
84 2-methylglyceric acid, cis-2-methyl-1,3,4-trihydroxy-1-butene, 3-methyl-2,3,4-trihydroxy-1-butene,  
85 trans-2-methyl-1,3,4-trihydroxy-1-butene, 2-methylthreitol, and 2-methylerythritol were  
86 quantified using erythritol. The 2,3-dihydroxy-4-oxopentanoic acid was quantified using citric  
87 acid. The pinic acid and 3-methyl-1,2,3-butanetricarboxylic acid were quantified using pinonic  
88 acid. The  $\beta$ -caryophyllinic acid was quantified using octadecanoic acid (Table S1). The limits of  
89 detection (LOD) and quantification (LOQ) for the target compounds were determined based on  
90 signal-to-noise ratios of 3:1 and 10:1, respectively. In this study, the LODs ranged from 0.05 to  
91  $0.30 \text{ ng } \mu\text{L}^{-1}$ , which correspond to ambient concentrations of 0.03 to  $0.23 \text{ ng m}^{-3}$  calculated for a  
92 typical sampling volume of  $1300 \text{ m}^3$

93 Prior to sampling, all filters were subjected to a baking process at  $450 \text{ }^\circ\text{C}$  for 4 hours to  
94 eliminate residual organic contaminants. Additionally, all glassware was rinsed with methanol,  
95 dichloromethane, and hexane immediately before use to prevent potential contamination. To  
96 ensure data integrity, blank experiments and recovery tests were systematically performed during  
97 sample analysis. Field blanks were routinely collected at the end of each month and analyzed  
98 alongside the filter samples. The results indicated that background contamination was negligible,

99 accounting for less than 3% of the concentrations found in the samples. Recovery rates for all  
100 target compounds spiked onto pre-combusted blank filters ranged from 82% to 109% (n = 3) and  
101 were treated as real samples (Table S1). Data presented herein were adjusted for field blanks but  
102 were not corrected for recoveries.

103

#### 104 **References in Texts**

105 Ding, X., Wang, X. M., Gao, B., Fu, X. X., He, Q. F., Zhao, X. Y., Yu, J. Z., and Zheng, M.:  
106 Tracer-based estimation of secondary organic carbon in the Pearl River Delta, south China, J.  
107 Geophys. Res-Atmos., 117, <https://doi.org/10.1029/2011JD016596>, 2012.

108 Fu, P. Q., Kawamura, K., Okuzawa, K., Aggarwal, S. G., Wang, G., Kanaya, Y., and Wang, Z.:  
109 Organic molecular compositions and temporal variations of summertime mountain aerosols  
110 over Mt. Tai, North China Plain, J. Geophys. Res-Atmos., 113,  
111 <https://doi.org/10.1029/2008JD009900>, 2008.

112 Fu, P. Q., Kawamura, K., Pavuluri, C. M., Swaminathan, T., and Chen, J.: Molecular  
113 characterization of urban organic aerosol in tropical India: contributions of primary emissions  
114 and secondary photooxidation, Atmos. Chem. Phys., 10, 2663–2689, <https://doi.org/10.2663-2689>, 10.5194/acp-10-2663-2010, 2010.

116 Fu, P. Q., Kawamura, K., Chen, J., and Miyazaki, Y.: Secondary Production of Organic Aerosols  
117 from Biogenic VOCs over Mt. Fuji, Japan, Environ. Sci. Technol., 48, 8491–8497,  
118 <https://doi.org/10.1021/es500794d>, 2014.

119 Wang, G. H., and Kawamura, K.: Molecular Characteristics of Urban Organic Aerosols from  
120 Nanjing: A Case Study of A Mega-City in China, Environ. Sci. Technol., 39, 7430–7438,  
121 <https://doi.org/10.1021/es051055+>, 2005.

122 Wang, G. H., Kawamura, K., Lee, S., Ho, K., and Cao, J. J.: Molecular, Seasonal, and Spatial  
123 Distributions of Organic Aerosols from Fourteen Chinese Cities, Environ. Sci. Technol., 40,  
124 4619–4625, <https://doi.org/10.1021/es060291x>, 2006.

125 Yuan, Q., Lai, S. C., Song, J. W., Ding, X., Zheng, L. S., Wang, X. M., Zhao, Y., Zheng, J. Y., Yue, D.  
126 L., Zhong, L.J., Niu, X. J., and Zhang, Y. Y: Seasonal cycles of secondary organic aerosol tracers in  
127 rural Guangzhou, Southern China: The importance of atmospheric oxidants, Environ. Pollut., 240,  
128 884–893, <https://doi.org/10.1016/j.envpol.2018.05.009>, 2018.

129

130

131

132  
133  
134

**Table S1. Details of polar organic compounds identified using the GC/MS method, including limits of detection (LOD) and quantification (LOQ), selected standards and their concentrations in recovery experiments, along with recovery rates.**

| Identified compounds  | Molecular formula                              | m/z      | Time (min) | LOD                | LOQ                 | LOP                 | Standards          | Standards                        | Recovery    |
|-----------------------|------------------------------------------------|----------|------------|--------------------|---------------------|---------------------|--------------------|----------------------------------|-------------|
|                       |                                                |          |            | ng m <sup>-3</sup> | ng ul <sup>-1</sup> | ng ul <sup>-1</sup> | ng m <sup>-3</sup> | CAS                              | %           |
| Fatty acids           |                                                |          |            |                    |                     |                     |                    |                                  |             |
| Decanoic acid         | C <sub>10</sub> H <sub>20</sub> O <sub>2</sub> | 117, 229 | 15.8       | 0.03               | 0.05                | 0.12                | 10                 | 334-48-5                         | 103.94±3.84 |
| Hendecanoic acid      | C <sub>11</sub> H <sub>22</sub> O <sub>2</sub> | 117, 243 | 17.7       | 0.03               | 0.05                | 0.13                | 10                 | 112-37-8                         | 102.92±2.58 |
| Lauric acid           | C <sub>12</sub> H <sub>24</sub> O <sub>2</sub> | 117, 257 | 19.3       | 0.06               | 0.08                | 0.28                | 10                 | 143-07-7                         | 94.51±2.74  |
| Tridecanoic acid      | C <sub>13</sub> H <sub>26</sub> O <sub>2</sub> | 117, 271 | 21.3       | 0.03               | 0.05                | 0.14                | 10                 | 638-53-9                         | 105.59±2.04 |
| Tetradecanoic acid    | C <sub>14</sub> H <sub>28</sub> O <sub>2</sub> | 117, 285 | 23.5       | 0.05               | 0.07                | 0.23                | 10                 | 544-63-8                         | 95.66±1.74  |
| Pentadecylic acid     | C <sub>15</sub> H <sub>30</sub> O <sub>2</sub> | 117, 299 | 24.9       | 0.03               | 0.05                | 0.15                | 10                 | 1002-84-2                        | 98.18±1.65  |
| Palmitoleic Acid      | C <sub>16</sub> H <sub>30</sub> O <sub>2</sub> | 117, 313 | 25.5       | 0.05               | 0.06                | 0.21                | 10                 | 373-49-9                         | 97.92±0.63  |
| Palmitic acid         | C <sub>16</sub> H <sub>32</sub> O <sub>2</sub> | 117, 313 | 26.5       | 0.16               | 0.21                | 0.71                | 10                 | 57-10-3                          | 87.47±3.52  |
| Heptadecanoic acid    | C <sub>17</sub> H <sub>34</sub> O <sub>2</sub> | 117, 327 | 28.8       | 0.12               | 0.16                | 0.54                | 10                 | 506-12-7                         | 94.70±2.77  |
| Oleic Acid            | C <sub>18</sub> H <sub>34</sub> O <sub>2</sub> | 117, 341 | 30.1       | 0.04               | 0.06                | 0.19                | 10                 | 112-80-1                         | 90.34±5.67  |
| Octadecanoic acid     | C <sub>18</sub> H <sub>36</sub> O <sub>2</sub> | 117, 341 | 30.5       | 0.10               | 0.13                | 0.44                | 10                 | 57-11-4                          | 93.27±2.71  |
| Nonadecanoic acid     | C <sub>19</sub> H <sub>38</sub> O <sub>2</sub> | 117, 355 | 32.4       | 0.05               | 0.07                | 0.22                | 10                 | 646-30-0                         | 86.48±4.56  |
| Icosanoic acid        | C <sub>20</sub> H <sub>40</sub> O <sub>2</sub> | 117, 369 | 34.0       | 0.13               | 0.17                | 0.58                | 10                 | 506-30-9                         | 91.03±0.42  |
| Henicosanoic acid     | C <sub>21</sub> H <sub>42</sub> O <sub>2</sub> | 117, 383 | 35.7       | 0.13               | 0.16                | 0.54                | 10                 | 2363-71-5                        | 86.84±3.95  |
| Docosanoic acid       | C <sub>22</sub> H <sub>44</sub> O <sub>2</sub> | 117, 397 | 37.3       | 0.06               | 0.07                | 0.24                | 10                 | 112-85-6                         | 97.33±6.35  |
| Tricosanoic acid      | C <sub>23</sub> H <sub>46</sub> O <sub>2</sub> | 117, 411 | 38.8       | 0.08               | 0.11                | 0.36                | 10                 | 2433-96-7                        | 108.87±0.86 |
| Tetracosanoic acid    | C <sub>24</sub> H <sub>48</sub> O <sub>2</sub> | 117, 425 | 40.3       | 0.04               | 0.05                | 0.16                | 10                 | 557-59-5                         | 97.39±1.09  |
| Pentacosanoic acid    | C <sub>25</sub> H <sub>50</sub> O <sub>2</sub> | 117, 439 | 41.7       | 0.12               | 0.16                | 0.53                | 10                 | 506-38-7                         | 88.17±1.69  |
| Hexacosanoic acid     | C <sub>26</sub> H <sub>52</sub> O <sub>2</sub> | 117, 453 | 43.4       | 0.23               | 0.30                | 1.01                | 10                 | 506-46-7                         | 103.71±1.46 |
| Heptacosanoic acid    | C <sub>27</sub> H <sub>54</sub> O <sub>2</sub> | 117, 467 | 44.7       | 0.04               | 0.06                | 0.19                | 10                 | 7138-40-1                        | 105.24±3.05 |
| Octacosanoic acid     | C <sub>28</sub> H <sub>56</sub> O <sub>2</sub> | 117, 481 | 45.5       | 0.06               | 0.08                | 0.27                | 10                 | 506-48-9                         | 96.44±2.83  |
| Nonacosanoic acid     | C <sub>29</sub> H <sub>58</sub> O <sub>2</sub> | 117, 495 | 46.9       | 0.07               | 0.10                | 0.32                | 10                 | 4250-38-8                        | 100.22±2.14 |
| Triacontanoic acid    | C <sub>30</sub> H <sub>60</sub> O <sub>2</sub> | 117, 509 | 48.2       | 0.07               | 0.09                | 0.29                | 10                 | 506-50-3                         | 101.73±5.72 |
| Hentriacontanoic acid | C <sub>31</sub> H <sub>62</sub> O <sub>2</sub> | 117, 523 | 50.1       | 0.05               | 0.07                | 0.23                | 10                 | 4250-38-8<br>(Nonacosanoic acid) | 100.22±2.14 |
| Dotriacontanoic acid  | C <sub>32</sub> H <sub>64</sub> O <sub>2</sub> | 117, 537 | 53.8       | 0.03               | 0.05                | 0.15                | 10                 | 506-50-3<br>(Triacontanoic acid) | 101.73±5.72 |
| Fatty alcohols        |                                                |          |            |                    |                     |                     |                    |                                  |             |
| Tetradecanol          | C <sub>14</sub> H <sub>30</sub> O              | 75, 271  | 18.0       | 0.05               | 0.07                | 0.23                | 10                 | 112-72-1                         | 101.61±0.88 |
| Pentadecanol          | C <sub>15</sub> H <sub>32</sub> O              | 75, 285  | 20.9       | 0.04               | 0.06                | 0.18                | 10                 | 629-76-5                         | 108.13±1.56 |
| Hexadecanol           | C <sub>16</sub> H <sub>34</sub> O              | 75, 299  | 23.6       | 0.12               | 0.16                | 0.53                | 10                 | 36653-82-4                       | 90.08±1.34  |
| Heptadecanol          | C <sub>17</sub> H <sub>36</sub> O              | 75, 313  | 26.1       | 0.03               | 0.05                | 0.14                | 10                 | 1454-85-9                        | 84.56±2.61  |
| Octadecanol           | C <sub>18</sub> H <sub>38</sub> O              | 75, 327  | 28.4       | 0.16               | 0.21                | 0.71                | 10                 | 112-92-5                         | 87.61±2.85  |
| Nonadecanol           | C <sub>19</sub> H <sub>40</sub> O              | 75, 341  | 30.1       | 0.06               | 0.08                | 0.27                | 10                 | 1454-84-8                        | 90.88±0.46  |
| Eicosanol             | C <sub>20</sub> H <sub>42</sub> O              | 75, 355  | 32.3       | 0.04               | 0.05                | 0.17                | 10                 | 629-96-9                         | 98.27±1.52  |
| Heneicosanol          | C <sub>21</sub> H <sub>44</sub> O              | 75, 369  | 34.5       | 0.05               | 0.07                | 0.23                | 10                 | 15594-90-8                       | 95.56±2.28  |
| Docosanol             | C <sub>22</sub> H <sub>46</sub> O              | 75, 383  | 36.1       | 0.04               | 0.05                | 0.15                | 10                 | 661-19-8                         | 108.51±0.86 |
| Tricosanol            | C <sub>23</sub> H <sub>48</sub> O              | 75, 397  | 38.6       | 0.03               | 0.05                | 0.13                | 10                 | 3331-01-5                        | 106.15±5.09 |
| Tetracosanol          | C <sub>24</sub> H <sub>50</sub> O              | 75, 411  | 39.1       | 0.08               | 0.10                | 0.34                | 10                 | 506-51-4                         | 96.03±4.57  |
| Pentacosanol          | C <sub>25</sub> H <sub>52</sub> O              | 75, 425  | 40.5       | 0.06               | 0.08                | 0.27                | 10                 | 3331-01-5<br>(Tricosanol)        | 106.15±5.09 |

|                                                     |                                                 |               |      |      |      |      |      |                             |              |
|-----------------------------------------------------|-------------------------------------------------|---------------|------|------|------|------|------|-----------------------------|--------------|
| Hexacosanol                                         | C <sub>26</sub> H <sub>54</sub> O               | 75, 439       | 42.3 | 0.06 | 0.08 | 0.25 | 10   | 506-52-5                    | 85.91 ±4.75  |
| Heptacosanol                                        | C <sub>27</sub> H <sub>56</sub> O               | 75, 453       | 43.5 | 0.08 | 0.10 | 0.33 | 10   | 2004-39-9                   | 98.48 ±4.80  |
| Octacosanol                                         | C <sub>28</sub> H <sub>58</sub> O               | 75, 467       | 45.0 | 0.10 | 0.13 | 0.44 | 10   | 557-61-9                    | 92.88 ±4.34  |
| Nonacosanol                                         | C <sub>29</sub> H <sub>60</sub> O               | 75, 481       | 46.3 | 0.11 | 0.15 | 0.49 | 10   | 2004-39-9<br>(Heptacosanol) | 98.48 ±4.80  |
| Triaccontanol                                       | C <sub>30</sub> H <sub>62</sub> O               | 75, 495       | 48.3 | 0.13 | 0.17 | 0.57 | 10   | 593-50-0                    | 89.50 ±3.81  |
| Hentriacontanol                                     | C <sub>31</sub> H <sub>64</sub> O               | 75, 509       | 50.2 | 0.09 | 0.11 | 0.37 | n.a. | 2004-39-9<br>(Heptacosanol) | 98.48 ±4.80  |
| Dotriacontanol                                      | C <sub>32</sub> H <sub>66</sub> O               | 75, 523       | 52.7 | 0.06 | 0.08 | 0.27 | n.a. | 593-50-0<br>(Triaccontanol) | 89.50 ±3.81  |
| Cholesterol                                         | C <sub>27</sub> H <sub>46</sub> O               | 129, 458      | 45.1 | 0.10 | 0.13 | 0.45 | 10   | 57-88-5                     | 87.23 ±1.51  |
| Stigmasterol                                        | C <sub>29</sub> H <sub>48</sub> O               | 129, 484      | 46.5 | 0.08 | 0.11 | 0.36 | 10   | 83-48-7                     | 98.71 ±0.85  |
| β-sitosterol                                        | C <sub>29</sub> H <sub>50</sub> O               | 129, 486      | 46.8 | 0.11 | 0.15 | 0.49 | 10   | 83-46-5                     | 88.32 ±4.07  |
| Saccharides                                         |                                                 |               |      |      |      |      |      |                             |              |
| Ribose                                              | C <sub>5</sub> H <sub>10</sub> O <sub>5</sub>   | 191, 204, 217 | 19.5 | 0.12 | 0.16 | 0.53 | 20   | 50-69-1                     | 90.34 ±2.8   |
| Galactosan                                          | C <sub>6</sub> H <sub>10</sub> O <sub>5</sub>   | 204, 217, 333 | 19.8 | 0.13 | 0.16 | 0.55 | 20   | 644-76-8                    | 90.29 ±0.15  |
| Mannosan                                            | C <sub>6</sub> H <sub>10</sub> O <sub>5</sub>   | 204, 217, 333 | 20.1 | 0.10 | 0.13 | 0.44 | 20   | 14168-65-1                  | 88.92 ±2.04  |
| Levoglucofan                                        | C <sub>6</sub> H <sub>10</sub> O <sub>5</sub>   | 204, 217, 333 | 21.2 | 0.16 | 0.20 | 0.68 | 20   | 498-07-7                    | 111.28 ±5.07 |
| Arabitol                                            | C <sub>5</sub> H <sub>12</sub> O <sub>5</sub>   | 217, 307, 319 | 22.3 | 0.09 | 0.11 | 0.37 | 20   | 488-82-4                    | 93.33 ±3.25  |
| Fructose                                            | C <sub>6</sub> H <sub>12</sub> O <sub>6</sub>   | 191, 204, 217 | 22.5 | 0.09 | 0.12 | 0.41 | 20   | 57-48-7                     | 89.89 ±9.50  |
| Pinitol                                             | C <sub>7</sub> H <sub>14</sub> O <sub>6</sub>   | 217, 260, 318 | 22.8 | 0.06 | 0.07 | 0.24 | 20   | 10284-63-6                  | 103.43 ±0.88 |
| Galactose                                           | C <sub>6</sub> H <sub>12</sub> O <sub>6</sub>   | 204, 191, 217 | 23.1 | 0.07 | 0.10 | 0.32 | 20   | 59-23-4                     | 88.91 ±6.66  |
| Glucose                                             | C <sub>6</sub> H <sub>12</sub> O <sub>6</sub>   | 191, 204, 217 | 23.8 | 0.11 | 0.15 | 0.49 | 20   | 50-99-7                     | 97.50 ±2.46  |
| Mannitol                                            | C <sub>6</sub> H <sub>14</sub> O <sub>6</sub>   | 205, 217, 319 | 24.3 | 0.13 | 0.16 | 0.55 | 20   | 69-65-8                     | 102.68 ±3.08 |
| Inositol                                            | C <sub>6</sub> H <sub>12</sub> O <sub>6</sub>   | 217, 305, 318 | 27.1 | 0.06 | 0.08 | 0.27 | 20   | 87-89-8                     | 97.82 ±6.98  |
| Sucrose                                             | C <sub>12</sub> H <sub>22</sub> O <sub>11</sub> | 217, 361, 437 | 35.3 | 0.05 | 0.06 | 0.21 | 20   | 57-50-1                     | 93.08 ±2.96  |
| Lactose                                             | C <sub>12</sub> H <sub>22</sub> O <sub>11</sub> | 191, 217, 361 | 36.2 | 0.04 | 0.05 | 0.16 | 20   | 63-42-3                     | 96.02 ±3.06  |
| Maltose                                             | C <sub>12</sub> H <sub>22</sub> O <sub>11</sub> | 204, 217, 361 | 38.1 | 0.09 | 0.11 | 0.37 | 20   | 69-79-4                     | 91.13 ±4.13  |
| Turanose                                            | C <sub>12</sub> H <sub>22</sub> O <sub>11</sub> | 147, 217, 361 | 38.5 | 0.07 | 0.09 | 0.29 | 20   | 547-25-1                    | 94.45 ±1.10  |
| Trehalose                                           | C <sub>12</sub> H <sub>22</sub> O <sub>11</sub> | 147, 217, 361 | 39.0 | 0.08 | 0.10 | 0.34 | 20   | 99-20-7                     | 96.47 ±6.23  |
| Others (Monoacids, diacids, polyacids, and polyols) |                                                 |               |      |      |      |      |      |                             |              |
| Benzoic acid                                        | C <sub>7</sub> H <sub>6</sub> O <sub>2</sub>    | 77, 105, 179  | 10.5 | 0.06 | 0.07 | 0.24 | 5    | 65-85-0                     | 81.66 ±4.79  |
| Glycerol                                            | C <sub>3</sub> H <sub>8</sub> O <sub>3</sub>    | 73, 171, 308  | 11.7 | 0.06 | 0.08 | 0.28 | 5    | 56-81-5                     | 84.73 ±1.75  |
| Glyceric acid                                       | C <sub>3</sub> H <sub>6</sub> O <sub>4</sub>    | 73, 247, 292  | 12.2 | 0.10 | 0.13 | 0.45 | 5    | 56-81-5<br>(Glycerol)       | 84.73 ±1.75  |
| 2-Methylglyceric acid                               | C <sub>4</sub> H <sub>8</sub> O <sub>4</sub>    | 203, 219, 306 | 13.3 | 0.09 | 0.11 | 0.37 | 5    | 149-32-6<br>(Erythritol)    | 87.19 ±3.53  |
| Cis-2-methyl-1,3,4-trihydroxy-1-butene              | C <sub>5</sub> H <sub>10</sub> O <sub>3</sub>   | 73, 147, 231  | 14.2 | 0.08 | 0.10 | 0.33 | 5    | 149-32-6<br>(Erythritol)    | 87.19 ±3.53  |
| 3-methyl-2,3,4-trihydroxy-1-butene                  | C <sub>5</sub> H <sub>10</sub> O <sub>3</sub>   | 147, 215, 231 | 15.1 | 0.10 | 0.13 | 0.44 | 5    | 149-32-6<br>(Erythritol)    | 87.19 ±3.53  |
| Trans-2-methyl-1,3,4-trihydroxy-1-butene            | C <sub>5</sub> H <sub>10</sub> O <sub>3</sub>   | 73, 147, 231  | 15.6 | 0.06 | 0.07 | 0.25 | 5    | 149-32-6<br>(Erythritol)    | 87.19 ±3.53  |
| Malic acid                                          | C <sub>4</sub> H <sub>6</sub> O <sub>5</sub>    | 73, 245, 287  | 16.0 | 0.11 | 0.15 | 0.50 | 5    | 636-61-3                    | 84.61 ±6.92  |
| 2,3-Dihydroxy-4-oxopentanoic acid (DHOPA)           | C <sub>5</sub> H <sub>8</sub> O <sub>5</sub>    | 189, 247, 350 | 16.1 | 0.10 | 0.13 | 0.44 | 5    | 77-92-9 (Citric acid)       | 83.88 ±1.72  |
| Citric acid                                         | C <sub>6</sub> H <sub>8</sub> O <sub>7</sub>    | 73, 89, 357   | 16.5 | 0.19 | 0.24 | 0.81 | 5    | 77-92-9                     | 83.88 ±1.72  |
| Pinonic acid                                        | C <sub>10</sub> H <sub>16</sub> O <sub>3</sub>  | 125, 171, 257 | 16.8 | 0.13 | 0.16 | 0.54 | 5    | 61826-55-9                  | 97.31 ±6.29  |
| 2-Methylthreitol                                    | C <sub>5</sub> H <sub>12</sub> O <sub>4</sub>   | 129, 219, 277 | 17.8 | 0.08 | 0.11 | 0.35 | 5    | 149-32-6<br>(Erythritol)    | 87.19 ±3.53  |
| 2-Methylethritol                                    | C <sub>5</sub> H <sub>12</sub> O <sub>4</sub>   | 129, 219, 277 | 18.0 | 0.07 | 0.09 | 0.30 | 5    | 149-32-6<br>(Erythritol)    | 87.19 ±3.53  |

|                                                    |                                                |               |      |      |      |      |    |                                |             |
|----------------------------------------------------|------------------------------------------------|---------------|------|------|------|------|----|--------------------------------|-------------|
| 3-hydroxyglutaric acid                             | C <sub>5</sub> H <sub>8</sub> O <sub>5</sub>   | 185, 275, 349 | 18.2 | 0.09 | 0.11 | 0.37 | 5  | 638-18-6                       | 88.78±5.36  |
| 4-Hydroxybenzoic acid                              | C <sub>7</sub> H <sub>6</sub> O <sub>3</sub>   | 73, 225, 283  | 18.4 | 0.06 | 0.08 | 0.28 | 5  | 99-96-7                        | 92.58±5.37  |
| Pinic acid                                         | C <sub>9</sub> H <sub>14</sub> O <sub>4</sub>  | 129, 171, 241 | 20.5 | 0.09 | 0.11 | 0.37 | 5  | 61826-55-9<br>(Pinonic acid)   | 97.31±6.29  |
| Phthalic acid                                      | C <sub>8</sub> H <sub>6</sub> O <sub>4</sub>   | 221, 295      | 20.9 | 0.07 | 0.09 | 0.31 | 5  | 88-99-3                        | 92.45±7.45  |
| Isophthalic acid                                   | C <sub>8</sub> H <sub>6</sub> O <sub>4</sub>   | 221, 295      | 21.5 | 0.06 | 0.08 | 0.28 | 5  | 121-91-5                       | 94.27±3.05  |
| Terephthalic acid                                  | C <sub>8</sub> H <sub>6</sub> O <sub>4</sub>   | 221, 295      | 22.1 | 0.09 | 0.11 | 0.37 | 5  | 100-21-0                       | 95.04±6.27  |
| 3-methyl-1,2,3-butanetricarboxylic acid<br>(MBTCA) | C <sub>8</sub> H <sub>12</sub> O <sub>6</sub>  | 204, 245, 405 | 22.4 | 0.09 | 0.12 | 0.39 | 5  | 61826-55-9<br>(Pinonic acid)   | 97.31±6.29  |
| Vanillic acid                                      | C <sub>8</sub> H <sub>8</sub> O <sub>4</sub>   | 73, 223, 267  | 23.3 | 0.10 | 0.13 | 0.45 | 5  | 121-34-6                       | 85.73±4.65  |
| Syringic acid                                      | C <sub>9</sub> H <sub>10</sub> O <sub>5</sub>  | 73, 233, 297  | 23.6 | 0.09 | 0.11 | 0.37 | 5  | 530-57-4                       | 82.66 ±1.89 |
| β-caryophyllinic acid                              | C <sub>14</sub> H <sub>22</sub> O <sub>4</sub> | 117, 309, 383 | 25.1 | 0.12 | 0.16 | 0.54 | 10 | 57-11-4<br>(Octadecanoic acid) | 93.27±2.71  |
| Dehydroabietic acid                                | C <sub>20</sub> H <sub>28</sub> O <sub>2</sub> | 73, 239, 250  | 32.2 | 0.08 | 0.10 | 0.33 | 5  | 1740-19-8                      | 97.10±1.32  |

135  
136  
137  
138  
139  
140  
141  
142  
143  
144  
145  
146  
147  
148  
149  
150  
151  
152  
153  
154  
155  
156  
157  
158  
159  
160  
161  
162  
163  
164  
165  
166  
167  
168  
169  
170  
171  
172  
173  
174



175  
176

**Table S2. Representative compounds from various emission sources and their mass fractions in OC and OA. The aerosol mass fractions refer specifically to those present in PM<sub>2.5</sub>.**

| The mass fraction of tracers in POC and POA |                                              |                        |                  |        |                  |        |                                         |
|---------------------------------------------|----------------------------------------------|------------------------|------------------|--------|------------------|--------|-----------------------------------------|
| Sources                                     | Representative compounds                     | Hydrocarbon class      | f <sub>POC</sub> | SD     | f <sub>POA</sub> | SD     | References                              |
| Biomass burning                             | Levoglucofan                                 | Saccharides            | 0.1186           | 0.0941 | 0.0629           | 0.0678 | Andreae and Metlet, 2001; Andreae, 2019 |
| Coal burning                                | C27 <sup>a</sup> and C29 <sup>aβ</sup>       | Hopanes                | 0.0010           | 0.0010 | 0.0004           | 0.0004 | Zhang et al., 2008                      |
| Vehicle exhaust                             | benzo(g,h,i)perylene (BghiP)                 | PAHs                   | 0.0014           | 0.0020 | 0.0009           | 0.0013 | Oros and Simoneit, 2000                 |
| Cooking                                     | C16:0, C18:0, Stigmasterol, and β-sitosterol | Fatty acid and Sterols | 0.1783           | 0.1233 | 0.1153           | 0.0858 | He et al., 2004; Zhao et al., 2007      |
| Plant debris                                | Glucose                                      | Primary sugars         | 0.0516           | n.d.   | 0.0267           | n.d.   | Puxbaum and Tenze-Kunit, 2003           |
| Fungal spores                               | Mannitol                                     | Sugar alcohols         | 0.1308           | n.d.   | 0.0678           | n.d.   | Bauer et al., 2002 and 2008             |

  

| The mass fraction of tracers in SOC and SOA |                                                                                  |                    |                  |        |                  |        |                   |
|---------------------------------------------|----------------------------------------------------------------------------------|--------------------|------------------|--------|------------------|--------|-------------------|
| Sources                                     | Representative compounds                                                         | Precursor          | f <sub>SOC</sub> | SD     | f <sub>SOA</sub> | SD     | References        |
| Biogenic                                    | 2-MGA <sup>c</sup> , C5-alkene triols <sup>d</sup> , and MTLs <sup>e</sup>       | Hemiterpenes       | 0.1550           | 0.0390 | 0.0630           | 0.0160 | Kleindienst, 2007 |
| Biogenic                                    | PNA <sup>f</sup> , PA <sup>g</sup> , MBTCA <sup>h</sup> , and 3-HGA <sup>i</sup> | Monoterpene        | 0.2300           | 0.1110 | 0.1680           | 0.0810 | Kleindienst, 2007 |
| Biogenic                                    | β-caryophyllinic acid                                                            | Sesquiterpene      | 0.0230           | 0.0050 | 0.0109           | 0.0022 | Kleindienst, 2007 |
| Anthropogenic                               | DHOPA <sup>j</sup>                                                               | Toluene            | 0.0079           | 0.0027 | 0.0040           | 0.0011 | Kleindienst, 2007 |
| Anthropogenic                               | Phthalic acid                                                                    | PAHs (Naphthalene) | 0.0390           | 0.0084 | 0.0200           | 0.0084 | Kleindienst, 2012 |

177

178 <sup>a</sup>C27<sup>a</sup> and <sup>b</sup>C29<sup>aβ</sup>: 17<sup>a</sup>(H)-22,29,30-Trisnorhopane and 17(H),21(H)-30-Norhopane.

179 <sup>c</sup>2-MGA: 2-methylglyceric acid.

180 <sup>d</sup>C5-alkene triols: Cis-2-methyl-1,3,4-trihydroxy-1-butene, 3-methyl-2,3,4-trihydroxy-1-butene, and  
181 Trans-2-methyl-1,3,4-trihydroxy-1-butene.

182 <sup>e</sup>MTLs: 2-methylthreitol and 2-methylerythritol

183 <sup>f</sup>PNA: Pinonic acid.

184 <sup>g</sup>PA: Pinic acid

185 <sup>h</sup>MBTCA: 3-Methyl-1,2,3-butanetricarboxylic acid

186 <sup>i</sup>3-HGA: 3-Hydroxyglutaric acid

187 <sup>j</sup>DHOPA: 2,3-Dihydroxy-4-oxopentanoic acid

188 **References in Table S2**

- 189 Andreae, M. O., and Merlet, P.: Emission of trace gases and aerosols from biomass burning, *Global*  
190 *Biogeochem. Cy.*, 15, 955–966, <https://doi.org/10.1029/2000GB001382>, 2001.
- 191 Andreae, M. O.: Emission of trace gases and aerosols from biomass burning—an updated  
192 assessment, *Atmos. Chem. Phys.*, 19, 8523–8546, <https://doi.org/10.5194/acp-19-8523-2019>,  
193 2019.
- 194 Bauer, H., Kasper-Giebl, A., Zibuschka, F., Hitzenberger, R., Kraus, G. F., and Puxbaum, H.:  
195 Determination of the Carbon Content of Airborne Fungal Spores, *Anal. Chem.*, 74, 91–95,  
196 <https://doi.org/10.1021/ac010331+>, 2002.
- 197 Bauer, H., Claeys, M., Vermeylen, R., Schueller, E., Weinke, G., Berger, A., and Puxbaum, H.: Arabitol  
198 and mannitol as tracers for the quantification of airborne fungal spores, *Atmos. Environ.*, 42, 588–  
199 593, <https://doi.org/10.1016/j.atmosenv.2007.10.013>, 2008.
- 200 He, L. Y., Hu, M., Huang, X. F., Yu, B. D., Zhang, Y. H., and Liu, D. Q.: Measurement of  
201 emissions of fine particulate organic matter from Chinese cooking, *Atmos. Environ.*, 38, 6557–  
202 6564, <https://doi.org/10.1016/j.atmosenv.2004.08.034>, 2004.
- 203 Kleindienst, T. E., Jaoui, M., Lewandowski, M., Offenber, J. H., Lewis, C. W., Bhave, P. V., and  
204 Edney, E. O.: Estimates of the contributions of biogenic and anthropogenic hydrocarbons to  
205 secondary organic aerosol at a southeastern US location, *Atmos. Environ.*, 41, 8288–8300,  
206 <https://doi.org/10.1016/j.atmosenv.2007.06.045>, 2007.
- 207 Kleindienst, T. E., Jaoui, M., Lewandowski, M., Offenber, J. H., and Docherty, K. S.: The  
208 formation of SOA and chemical tracer compounds from the photooxidation of naphthalene and  
209 its methyl analogs in the presence and absence of nitrogen oxides, *Atmos. Chem. Phys.*, 12,  
210 8711–8726 <https://doi.org/10.5194/acp-12-8711-2012>, 2012.
- 211 Oros, D. R., and Simoneit, B. R. T.: Identification and emission rates of molecular tracers in coal  
212 smoke particulate matter, *Fuel*, 79, 515–536, [https://doi.org/10.1016/S0016-2361\(99\)00153-2](https://doi.org/10.1016/S0016-2361(99)00153-2),  
213 2000.
- 214 Puxbaum, H., and Tenze-Kunit, M.: Size distribution and seasonal variation of atmospheric  
215 cellulose, *Atmos. Environ.*, 37, 3693–3699, [https://doi.org/10.1016/S1352-2310\(03\)00451-5](https://doi.org/10.1016/S1352-2310(03)00451-5),  
216 2003.
- 217 Zhang, Y., Schauer, J. J., Zhang, Y., Zeng, L., Wei, Y., Liu, Y., and Shao, M.: Characteristics of  
218 Particulate Carbon Emissions from Real-World Chinese Coal Combustion, *Environ. Sci. Technol.*,  
219 42, 5068-5073, <https://doi.org/10.1021/es7022576>, 2008.
- 220 Zhao, Y. L., Hu, M., Slanina, S., and Zhang, Y. H.: Chemical Compositions of Fine Particulate Organic  
221 Matter Emitted from Chinese Cooking, *Environ. Sci. Technol.*, 41, 99–105,

222 <https://doi.org/10.1021/es0614518>, 2007.  
223  
224  
225  
226  
227  
228  
229  
230  
231  
232  
233  
234  
235  
236  
237  
238  
239  
240  
241  
242  
243  
244  
245  
246  
247  
248  
249  
250  
251  
252  
253  
254  
255  
256  
257  
258  
259  
260  
261  
262  
263  
264  
265  
266  
267  
268  
269  
270  
271  
272  
273

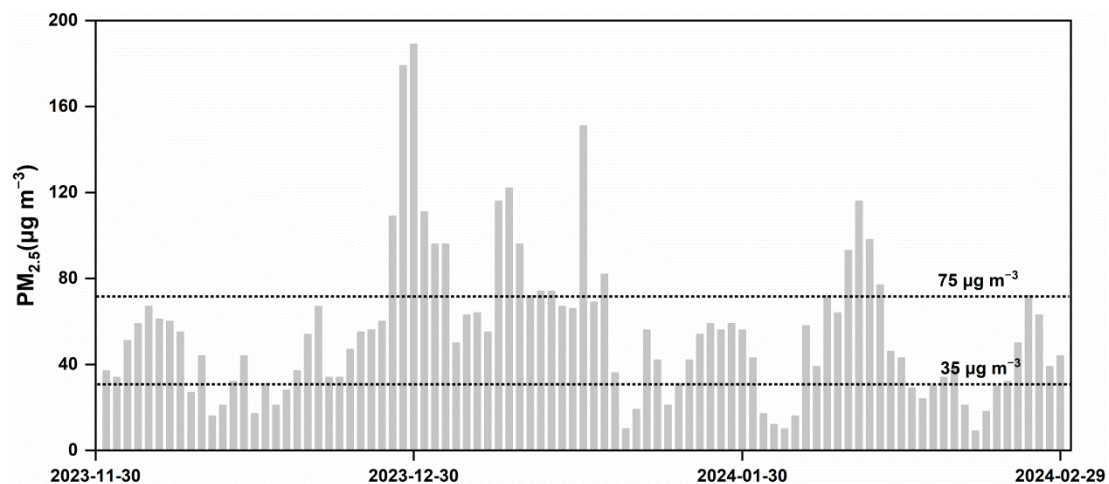

274  
 275 **Figure S1. Daily variation of PM<sub>2.5</sub> concentrations in Nanchang during the winter of 2023–**  
 276 **2024. Data are sourced from the China Air Quality Online Monitoring and Analysis**  
 277 **Platform (<https://www.aqistudy.cn/historydata/>).**  
 278

279  
 280  
 281  
 282  
 283  
 284  
 285  
 286  
 287  
 288  
 289  
 290  
 291  
 292  
 293  
 294  
 295  
 296  
 297  
 298  
 299  
 300  
 301  
 302  
 303  
 304  
 305  
 306  
 307  
 308  
 309  
 310  
 311  
 312

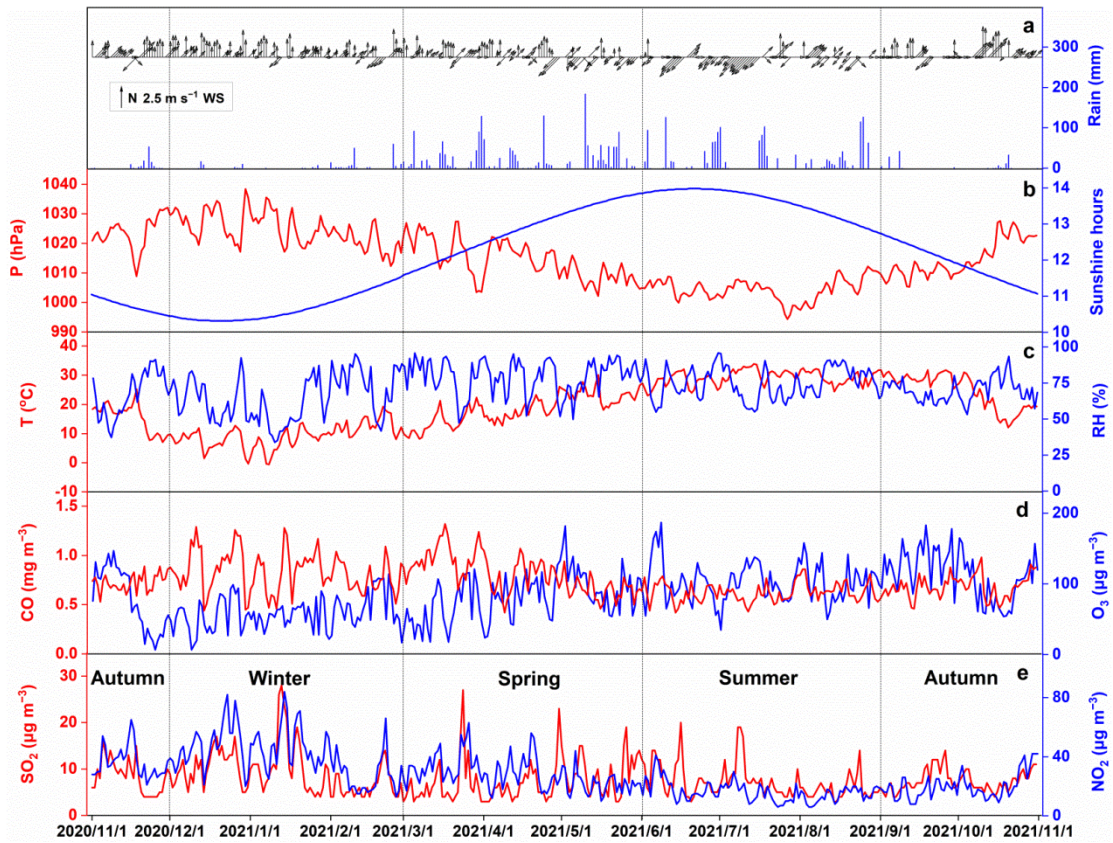

313  
 314 **Figure S2. Time series of meteorological parameters and gaseous pollutant concentrations**  
 315 **during sampling periods.**

316  
 317  
 318  
 319  
 320  
 321  
 322  
 323  
 324  
 325  
 326  
 327  
 328  
 329  
 330  
 331  
 332  
 333  
 334  
 335  
 336  
 337  
 338  
 339  
 340

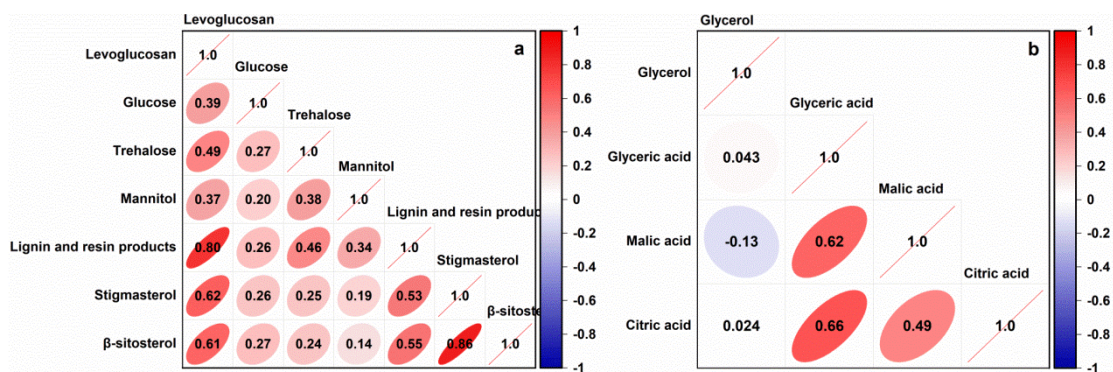

341  
 342 **Figure S3. (a) Correlation between levoglucosan and some primary sugars, sugar alcohols,**  
 343 **lignin, resin products, and sterols. (b) Correlation between glycerol and hydroxy acids.**  
 344

345  
 346  
 347  
 348  
 349  
 350  
 351  
 352  
 353  
 354  
 355  
 356  
 357  
 358  
 359  
 360  
 361  
 362  
 363  
 364  
 365  
 366  
 367  
 368  
 369  
 370  
 371  
 372  
 373  
 374  
 375  
 376  
 377  
 378  
 379  
 380  
 381  
 382

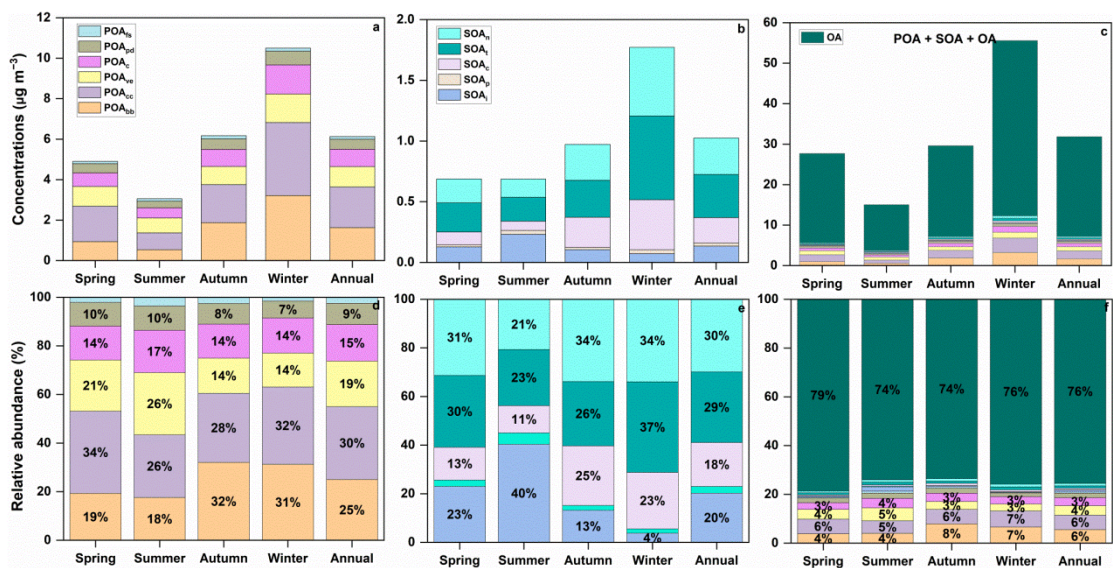

383  
 384 **Figure S4. Concentrations and relative abundances of primary organic aerosol (POA) from**  
 385 **biomass burning ( $\text{POA}_{\text{bb}}$ ), coal combustion ( $\text{POA}_{\text{cc}}$ ), vehicle exhaust ( $\text{POA}_{\text{ve}}$ ), cooking**  
 386 **( $\text{POA}_{\text{c}}$ ), plant debris ( $\text{POA}_{\text{pd}}$ ), and fungal spores ( $\text{POA}_{\text{fs}}$ ), alongside secondary organic**  
 387 **aerosol (SOA) from isoprene ( $\text{SOA}_{\text{i}}$ ),  $\alpha/\beta$ -pinene ( $\text{SOA}_{\text{p}}$ ),  $\beta$ -caryophyllene ( $\text{SOA}_{\text{c}}$ ), toluene**  
 388 **( $\text{SOA}_{\text{t}}$ ), and naphthalene ( $\text{SOA}_{\text{n}}$ ).**

389  
 390  
 391  
 392  
 393  
 394  
 395  
 396  
 397  
 398  
 399  
 400  
 401  
 402  
 403  
 404  
 405  
 406  
 407  
 408  
 409  
 410  
 411  
 412  
 413  
 414  
 415  
 416  
 417  
 418

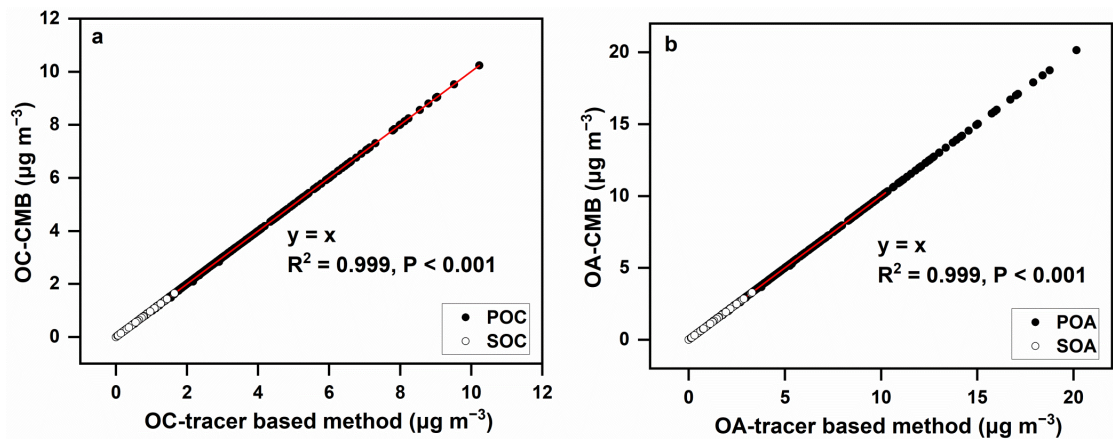

419  
 420  
 421  
 422  
 423  
 424  
 425  
 426  
 427  
 428  
 429  
 430  
 431  
 432  
 433  
 434  
 435  
 436  
 437  
 438  
 439  
 440  
 441  
 442  
 443  
 444  
 445  
 446  
 447  
 448  
 449  
 450  
 451  
 452  
 453  
 454  
 455  
 456  
 457  
 458

**Figure S5. Comparison of OC and OA concentrations calculated by CMB model with those calculated by tracer-based method.**



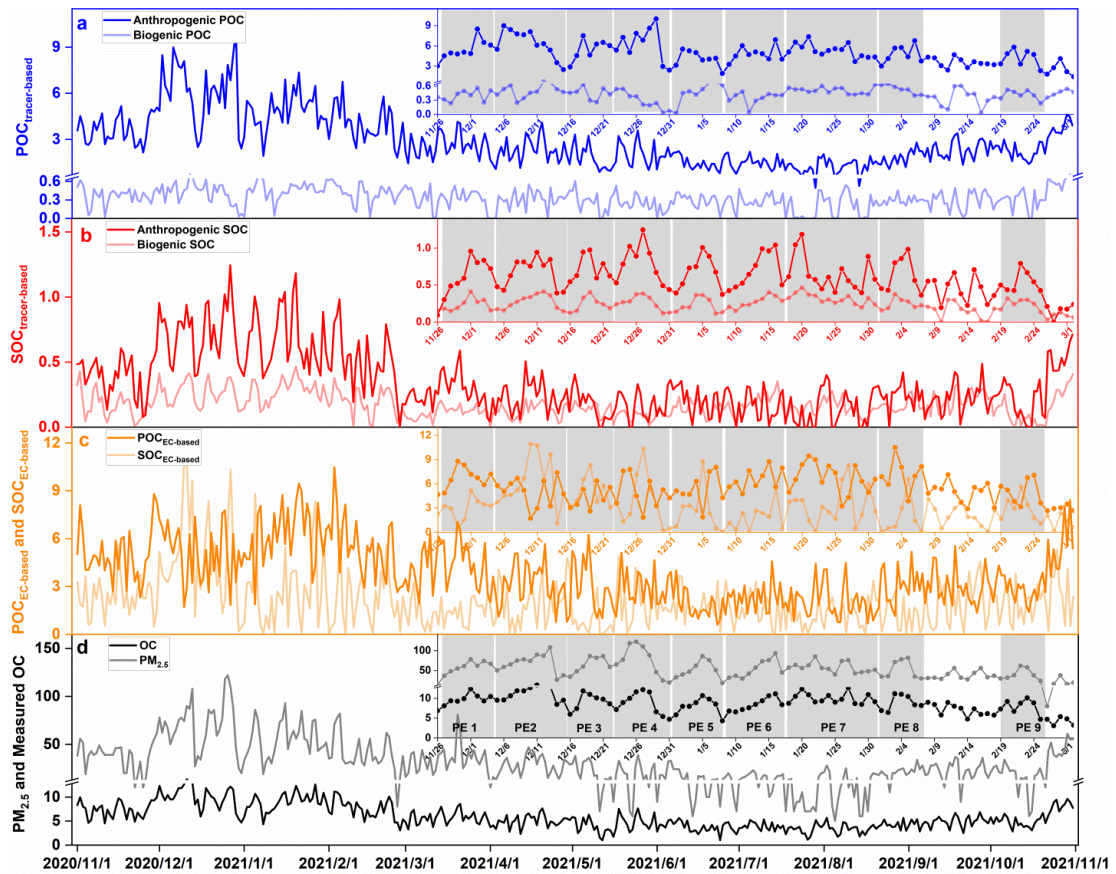

459  
 460  
 461  
 462  
 463

**Figure S6. Time series of POC and SOC concentrations calculated using the tracer-based method, alongside POC and SOC concentrations derived from the EC-based method, as well as PM<sub>2.5</sub> and measured OC concentrations during the sampling period**
